# Supplementary material
Source: PubMed Central journal article supplement (PMC7333991)

# THE LANCET

## Infectious Diseases

### Supplementary appendix

This appendix formed part of the original submission and has been peer reviewed.  
We post it as supplied by the authors.

Supplement to: Petersen E, Koopmans M, Go U, et al. Comparing SARS-CoV-2 with SARS-CoV and influenza pandemics. *Lancet Infect Dis* 2020; published online July 3.  
[https://doi.org/10.1016/S1473-3099\(20\)30484-9](https://doi.org/10.1016/S1473-3099(20)30484-9).

## Supplementary material

**Figure 1.** Basic reproductive number,  $R_0$ , for pandemic influenza, SARS-CoV, MERS-CoV and SARS-CoV-2. SARS; MERS; SARS-CoV-2; Pandemic influenza 2009; 1968 and 1957 and 2018.

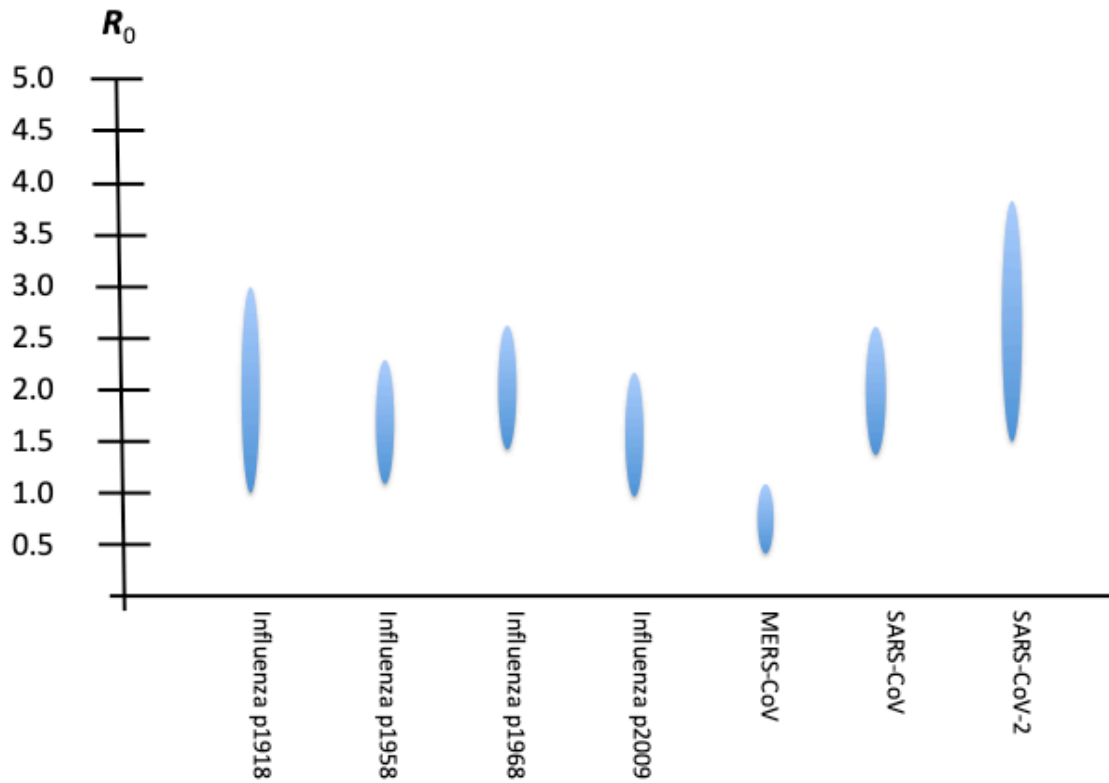

**Figure 2.** Map of excess population mortality week 12 to 18 provided by the European Mortality Monitoring project. The maps shows the z-scores of mortality in Europe. A z-score is the number of standard deviations by which the value of a raw score is above (or below) the mean value of what is being observed or measured.

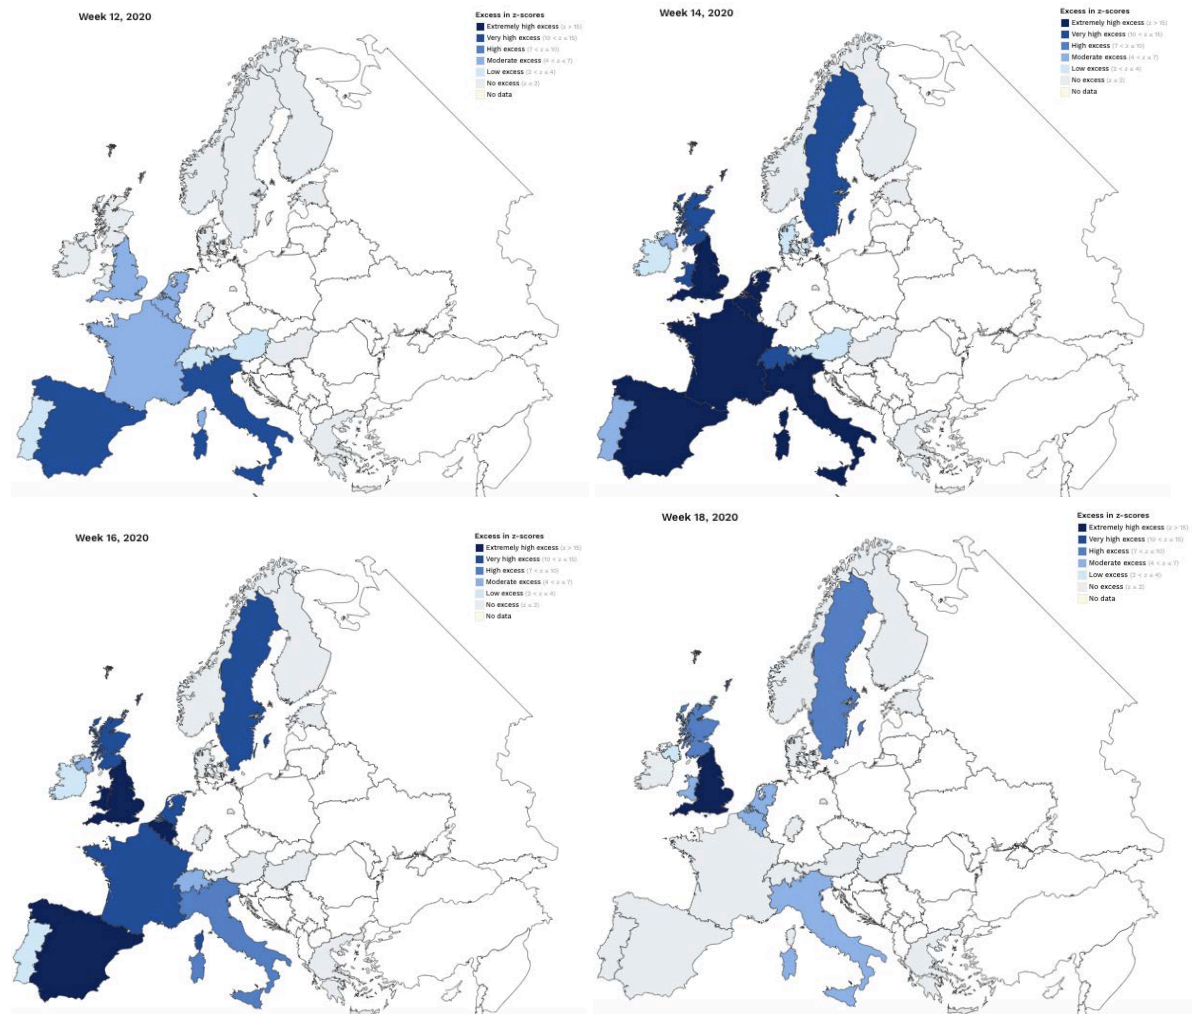

**Figure 3.** Daily number of new, reported cases in the United States, Spain, United Kingdom, South Korea, Germany and South Africa up to the 15<sup>th</sup> May [https://www.worldometers.info/coronavirus/].

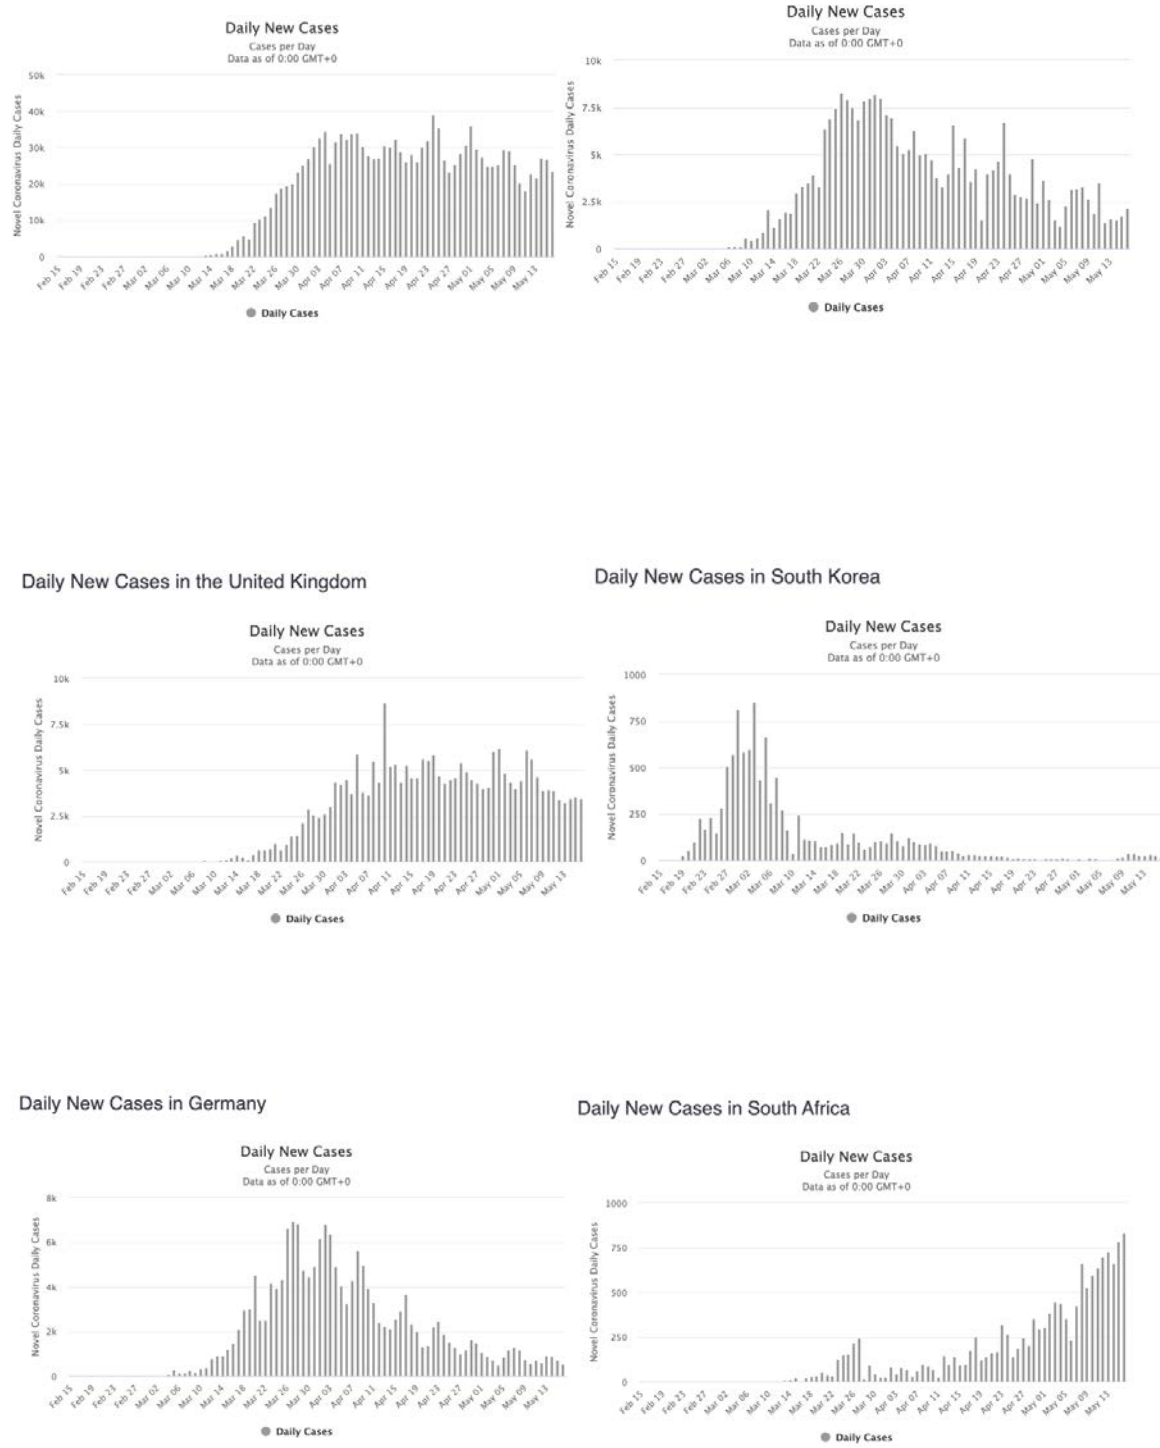

**Figure 4.** The epidemic curve in South Korea up to the 17<sup>th</sup> May

[Figure 1: Daily confirmed cases by chain of transmission]

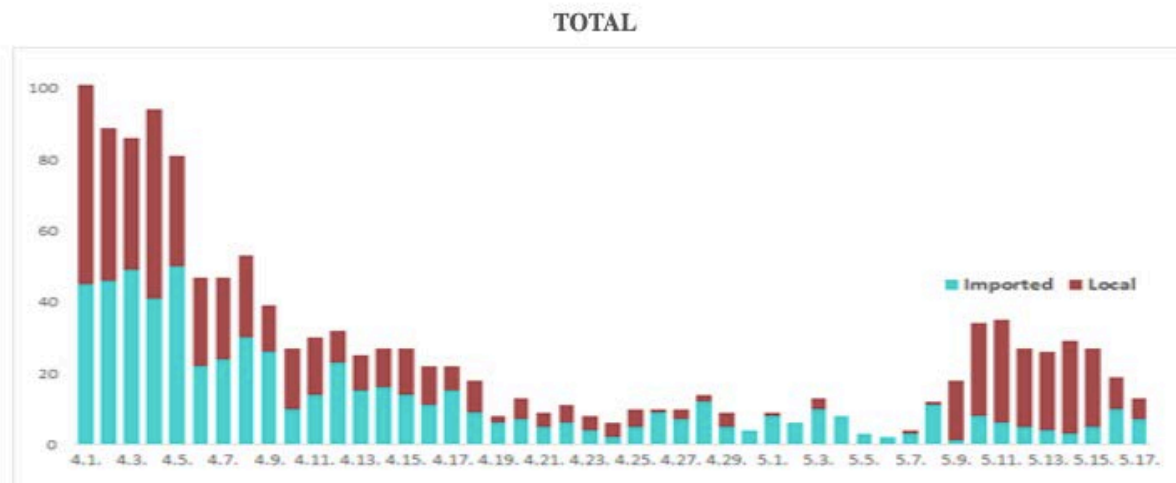

Supplement: mmc1.pdf [file mmc1.pdf]
